# Supplementary material
Source: PubMed Central journal article supplement (PMC3255942)
Supplement: supp_11.1.26_TableS1.pdf [file supp_11.1.26_TableS1.pdf]

## 1        **Supplementary Material File**

### 2        **Supplementary Method**

3        Four complementation strategies were attempted to complement the triple *AGS* mutant.  
4        These strategies were based on the complementation of the *AGS1* and *AGS3* genes. The  
5        *ags1*Δ showed a reduction of 50% α1,3 glucans and *ags3*Δ produced 3 times more melanin  
6        than the wild type, which make easier the identification of the complemented strain (2, 21).  
7        Strategies 1 and 2 used the *AGS3* construct which was obtained by PCR and contained 2kb of  
8        the 5' end, the full *AGS3* gene and 0.5kb of the 3'end. In strategy 1, co-transformations were  
9        undertaken with the *AGS3* construct and the *pTRI* plasmid containing the Pyrithiamine  
10        resistance gene (17), and the transformants were selected on 2.5 μg/ml pyrithiamine. In  
11        strategy 2 the transformants were selected on 1mg/ml 5 Fluoro-Orotic acid to pop-out the  
12        deletion cassette and replace it by homologous recombination with the *AGS3* construct (1). In  
13        Strategies 3 and 4 the cosmid containing the *AGS1* gene was used as previously described for  
14        the complementation of the single *ags1*Δ mutant (2): co-transformations were undertaken  
15        with a cosmid containing the *AGS1* gene (2) and either the *pSK-pTRI* plasmid containing the  
16        Pyrithiamine resistance marker (strategy 3), or the *pCB1635* plasmid containing the  
17        Sulfonylurea resistance gene, and the transformants were selected on Chlorimuron (Strategy  
18        4). The presence of the WT copy of the genes was investigated by PCR.

### 19        **Supplementary Figure S1**

20        Figure S1: Construction of a triple *AGS* mutant in *A. fumigatus* and Southern blots  
21        showing the correct integration of the resistance marker. (A) Deletion of *AGS1*. In the left  
22        panel is the restriction map of the *AGS1* locus before (upper section) and after (lower section)  
23        gene replacement using deletion cassette encompassing the *HPH* gene (middle section).  
24        Southern hybridization of genomic DNA with *XhoI* restriction enzyme digests of  
25        *AkuB<sup>ku80</sup> pyrG*Δ (*AkuB*) and *AGS1* transformants (*ags1*Δ). The band size correlated with the  
26        predicted size from the left panel. (B) Deletion of *AGS2* using *BLE* gene (description as in  
27        1A). (C) Deletion of *AGS3* using *PYRG* gene (description as in 1A). For the double and triple  
28        mutants, it was verified that the successive deletion did not result in any perturbation of the  
29        successive mutations (right panel in C).

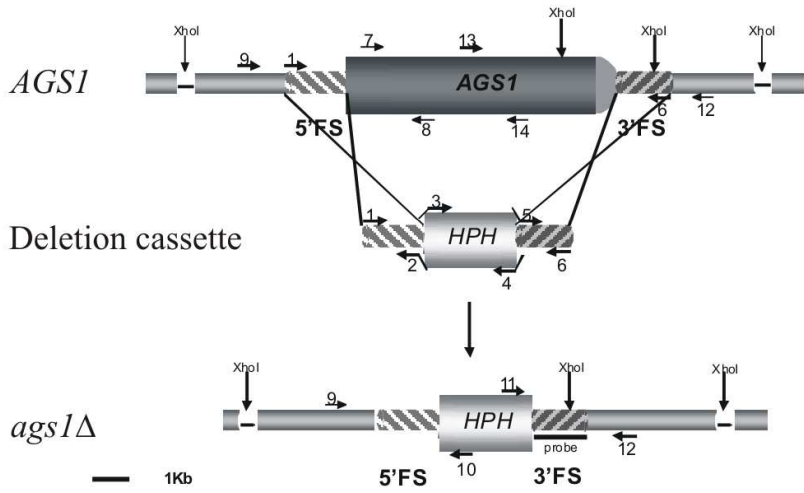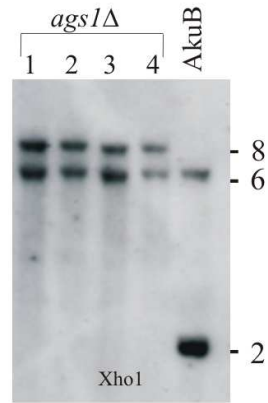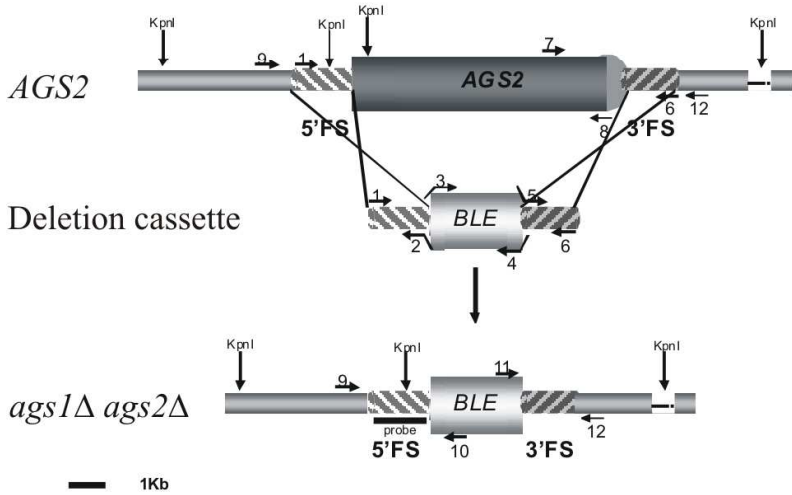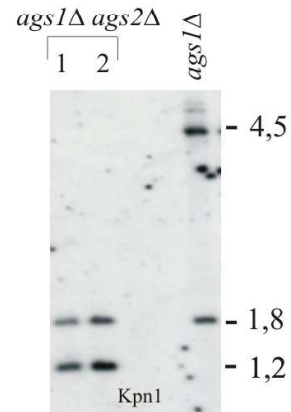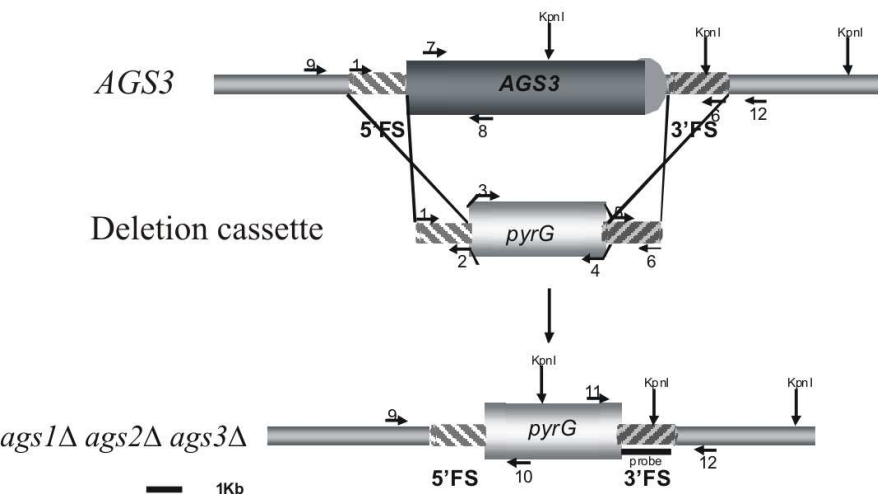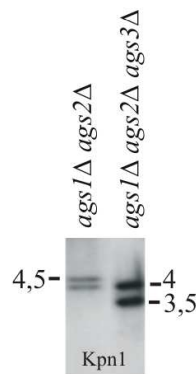

*AGS3*

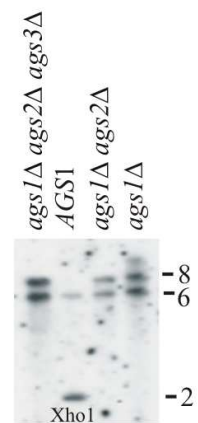

*AGS1*

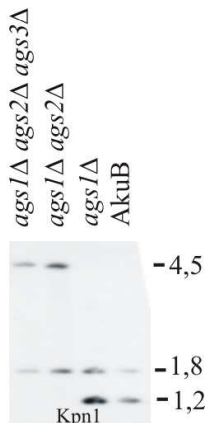

*AGS2*

| Name                        | Sequence (5' → 3')                                           | Purpose of this study                |
|-----------------------------|--------------------------------------------------------------|--------------------------------------|
| <i>AGS1 (Afu3G00910)</i>    |                                                              |                                      |
| 5Lags1 (1 in Fig. 1)        | ATACAATCAATAATGACTGGGTATCTACAG                               | L-flanking amplification             |
| 3Rags1 (6 in Fig. 1)        | CAAACCCAGACTCACCATTATAAAGAACC                                | R-flanking amplification             |
| 5hph'-3Lags1 (2 in Fig. 1)  | TCGTGAATCTTTTACCAGATCGGAAGCAATAATATGAATATCGTTATGTGCGTAATATG  | <i>HPH</i> amplification and fusion  |
| 3Lags1'-5hph (3 in Fig. 1)  | CATATTACGCACATAACGATATTCATATTATTGCTTCCGATCTGGTAAAAGATTCACGA  | L-flanking amplification and fusion  |
| 5Rags1'-3hph (4 in Fig. 1)  | GTCATTCCCTCGTTGAACTCCGGACATCAAATCAGAGCAGATTGTACTGAGAGTGCACC  | R-flanking amplification and fusion  |
| 3hph'-5Rags1 (5 in Fig. 1)  | GGTGCACTCTCAGTACAATCTGCTCTGATTGATGTCCGGAGTTCAACGAGGGAATGAC   | <i>HPH</i> amplification and fusion  |
| ags1atg2 (7 in Fig. 1)      | ATGAAGTGGGGATGGACC                                           | transformants screening              |
| ags1G1 (8 in Fig. 1)        | TCGGAGTCAGCATCTCATTG                                         | transformants screening              |
| ags1S6 (9 in Fig. 1)        | ATCCCCTCCGTCTCAACTCT                                         | transformants screening              |
| hph2 (10 in Fig. 1)         | AAAGCAGGAGAGGCACGATA                                         | transformants screening              |
| TrpC4 (11 in Fig. 1)        | GCACAGGTACACTTGTTTAGAGG                                      | transformants screening              |
| ags1S7 (12 in Fig. 1)       | CCCTATCCGGTCAGAGTTCA                                         | transformants screening              |
| ags1a (13 in Fig. 1)        | CGGCGTGGAATCAGTGCA                                           | expression                           |
| agsE1 (14 in Fig. 1)        | TCCTTGCTGGTGGACACG                                           | expression                           |
| <i>AGS2 (Afu2G11270)</i>    |                                                              |                                      |
| 5Lags2 (1 in Fig. 1)        | ATATAGTTGTTACTACGACAGTTCGATAG                                | L-flanking amplification             |
| 3Rags2 (6 in Fig. 1)        | GTCTTCACGGATGCTGGTTTTGAGT                                    | R-flanking amplification             |
| 5ble'-3Lags2 (2 in Fig. 1)  | TCGTGAATCTTTTACCAGATCGGAAGCAATCCCTCTTTTTATCCTCTAGAAAAGTTATTA | <i>BLE</i> amplification and fusion  |
| 3Lags2'-5ble (3 in Fig. 1)  | TAATAACTTTTCTAGAGGATAAAAAGAGGGATTGCTTCCGATCTGGTAAAAGATTCACGA | L-flanking amplification and fusion  |
| 5Rags2'-3ble (4 in Fig. 1)  | AGTCAGAGCAAAAAGTCAAAAATATTACATCAGAGCAGATTGTACTGAGAGTGCACC    | R-flanking amplification and fusion  |
| 3ble'-5Rags2 (5 in Fig. 1)  | GGTGCACTCTCAGTACAATCTGCTCTGATGTAATATTTTTGCACTTTTGCTCTGACT    | <i>BLE</i> amplification and fusion  |
| ags2 B2 (7 in Fig. 1)       | CCTCAGTACCACACTGAT                                           | transformants screening              |
| ags2 B1 (8 in Fig. 1)       | GTACGGTGACAAACATCG                                           | transformants screening              |
| ags2 S1 (9 in Fig. 1)       | GCTATCACATGGAGGGAAGG                                         | transformants screening              |
| ble1 (10 in Fig. 1)         | CAGAGCACCGGATGGGTCGAC                                        | transformants screening              |
| TrpC4 (11 in Fig. 1)        | GCACAGGTACACTTGTTTAGAGG                                      | transformants screening              |
| ags2 S2 (12 in Fig. 1)      | AGAAGGTTGCCCAATATC                                           | transformants screening              |
| <i>AGS3 (Afu1G15440)</i>    |                                                              |                                      |
| 5Lags3 (1 in Fig. 1)        | GTTAATAAGGCAGGGGGTGGCCATACTAAG                               | L-flanking amplification             |
| 3Rags3 (6 in Fig. 1)        | CCCTGTCTCTCAACCCTACTAGCATCACCT                               | R-flanking amplification             |
| 5pyrG'-3Lags3 (2 in Fig. 1) | GGAAAACCCTGGCGTTACCCAACCTAATCTCGGTGTCTCAATAATCAAACGACATGAGA  | <i>PYRG</i> amplification and fusion |
| 3Lags3'-5pyrG (3 in Fig. 1) | TCTCATGTCTGTTGATTATTGAGACACCGAGATTAAGTTGGGTAACGCCAGGGTTTTCC  | L-flanking amplification and fusion  |
| 5Rags3'-3pyrG (4 in Fig. 1) | AACCAAAGGCTGGTCTATCACCATTACAACACAGGAAAAGCTATGACCATGATTACGC   | R-flanking amplification and fusion  |
| 3pyrG'-5Rags3 (5 in Fig. 1) | GCGTAATCATGGTCATAGCTGTTTCTGTGTGTAATGGTGATAGGACCAGCCTTTGGTT   | <i>PYRG</i> amplification and fusion |
| ags3a (7 in Fig. 1)         | AACTGGCGTTTTCCCTGTCTA                                        | transformants screening              |
| ags3b (8 in Fig. 1)         | GGACAATACGCTGGCAATCTG                                        | transformants screening              |
| ags3 S8 (9 in Fig. 1)       | GGCCGTTAGCAATGAAAGAG                                         | transformants screening              |
| pyrG 7 (10 in Fig. 1)       | TACGGTCGCATAGCAGTGAG                                         | transformants screening              |
| pyrG 9 (11 in Fig. 1)       | GGTTCGTGTGCCTGGATACT                                         | transformants screening              |
| ags3 S9 (12 in Fig. 1)      | GGAGGAGATTGGTCGATTCA                                         | transformants screening              |
